# Supplementary material for: Disjunctive Programming for Multiobjective Discrete Optimisation
Source: Atypon-hosted journal article supplement (doi:10.1287/ijoc.2017.0804), 2018-11-01
Supplement: ijoc.2017.0804-sm.pdf [file ijoc.2017.0804-sm.pdf]

Authors are encouraged to submit new papers to INFORMS journals by means of a style file template, which includes the journal title. However, use of a template does not certify that the paper has been accepted for publication in the named journal. INFORMS journal templates are for the exclusive purpose of submitting to an INFORMS journal and should not be used to distribute the papers in print or online or to submit the papers to another publication.

## Online Supplement to “Disjunctive Programming for Multiobjective Discrete Optimisation”

Tolga Bektaş

Southampton Business School  
Centre for Operational Research, Management Science and Information Systems (CORMSIS)  
University of Southampton, Southampton, SO17 1BJ, United Kingdom  
T.Bektas@soton.ac.uk

---

### Detailed computational results for the MOAP, MOKP and MOTSP instances

**Table 1** Results for MOAP instances with  $|K| = 3$  and  $n = 10$

| Instance number | Time (s) | Disjunctive Programming |           |          |
|-----------------|----------|-------------------------|-----------|----------|
|                 |          | No. Sol.                | No. Disj. | Time (s) |
| 1               | 5.98     | 161                     | 232       | 6.52     |
| 2               | 10.44    | 236                     | 354       | 11.21    |
| 3               | 15.04    | 316                     | 459       | 15.15    |
| 4               | 4.17     | 125                     | 207       | 5.81     |
| 5               | 4.2      | 138                     | 207       | 5.96     |
| 6               | 11.79    | 223                     | 360       | 12.08    |
| 7               | 7.47     | 180                     | 273       | 8.37     |
| 8               | 1.81     | 65                      | 98        | 2.49     |
| 9               | 6.98     | 169                     | 254       | 7.31     |
| 10              | 6.48     | 155                     | 241       | 6.9      |

**Table 2** Results for MOAP instances with  $|K| = 3$  and  $n = 15$ 

|                 |          | Kirlik and Sayin (2014) | Disjunctive Programming |          |  |
|-----------------|----------|-------------------------|-------------------------|----------|--|
| Instance number | Time (s) | No. Sol.                | No. Disj.               | Time (s) |  |
| 1               | 98.69    | 878                     | 1296                    | 82.38    |  |
| 2               | 44.8     | 473                     | 694                     | 32.2     |  |
| 3               | 37.39    | 487                     | 680                     | 32.07    |  |
| 4               | 44.74    | 521                     | 757                     | 36.76    |  |
| 5               | 45.51    | 587                     | 814                     | 40.01    |  |
| 6               | 34.73    | 395                     | 609                     | 25.42    |  |
| 7               | 119.96   | 1109                    | 1561                    | 118.58   |  |
| 8               | 54.78    | 594                     | 862                     | 44.61    |  |
| 9               | 89.34    | 875                     | 1228                    | 78.31    |  |
| 10              | 74.5     | 830                     | 1175                    | 69.57    |  |

**Table 3** Results for MOAP instances with  $|K| = 4$  and  $n = 5$ 

|                 |          | Kirlik and Sayin (2014) | Disjunctive Programming |          |  |
|-----------------|----------|-------------------------|-------------------------|----------|--|
| Instance number | Time (s) | No. Sol.                | No. Disj.               | Time (s) |  |
| 1               | 1.15     | 47                      | 183                     | 2.36     |  |
| 2               | 0.22     | 29                      | 103                     | 1.05     |  |
| 3               | 0.37     | 32                      | 96                      | 1.32     |  |
| 4               | 1.11     | 54                      | 207                     | 2.63     |  |
| 5               | 0.72     | 47                      | 166                     | 2.36     |  |
| 6               | 0.27     | 22                      | 91                      | 1.11     |  |
| 7               | 0.1      | 13                      | 43                      | 0.64     |  |
| 8               | 0.71     | 40                      | 168                     | 2.02     |  |
| 9               | 0.49     | 35                      | 112                     | 1.27     |  |
| 10              | 0.13     | 21                      | 68                      | 0.9      |  |

**Table 4** Results for MOAP instances with  $|K| = 4$  and  $n = 10$ 

|                 |          | Kirlik and Sayin (2014) | Disjunctive Programming |          |  |
|-----------------|----------|-------------------------|-------------------------|----------|--|
| Instance number | Time (s) | No. Sol.                | No. Disj.               | Time (s) |  |
| 1               | 42.26    | 321                     | 1029                    | 34.53    |  |
| 2               | 172.95   | 857                     | 2720                    | 250.1    |  |
| 3               | 169.03   | 796                     | 2693                    | 232.96   |  |
| 4               | 332.97   | 1267                    | 4075                    | 773.83   |  |
| 5               | 293.17   | 1192                    | 3954                    | 688.91   |  |
| 6               | 304.86   | 1251                    | 4160                    | 764.39   |  |
| 7               | 101.74   | 568                     | 1840                    | 102.85   |  |
| 8               | 242.24   | 1128                    | 3522                    | 525.12   |  |
| 9               | 150.94   | 707                     | 2409                    | 178.18   |  |
| 10              | 189.29   | 865                     | 2880                    | 277.79   |  |

**Table 5** Results for MOKP instances with  $|K| = 3$  and  $n = 30$

|                 |          | Kirlik and Sayin (2014) | Disjunctive Programming |          |  |
|-----------------|----------|-------------------------|-------------------------|----------|--|
| Instance number | Time (s) | No. Sol.                | No. Disj.               | Time (s) |  |
| 1               | 2.56     | 88                      | 177                     | 5.38     |  |
| 2               | 7        | 196                     | 393                     | 16.12    |  |
| 3               | 4.15     | 118                     | 236                     | 10.67    |  |
| 4               | 1.49     | 63                      | 126                     | 3.27     |  |
| 5               | 1.46     | 69                      | 139                     | 3.47     |  |
| 6               | 3.04     | 103                     | 207                     | 6.41     |  |
| 7               | 9.65     | 266                     | 530                     | 26.34    |  |
| 8               | 2.99     | 98                      | 196                     | 6.95     |  |
| 9               | 1.75     | 62                      | 124                     | 3.86     |  |
| 10              | 2.94     | 95                      | 191                     | 5.83     |  |

**Table 6** Results for MOKP instances with  $|K| = 3$  and  $n = 40$

|                 |          | Kirlik and Sayin (2014) | Disjunctive Programming |          |  |
|-----------------|----------|-------------------------|-------------------------|----------|--|
| Instance number | Time (s) | No. Sol.                | No. Disj.               | Time (s) |  |
| 1               | 27.36    | 486                     | 964                     | 86.68    |  |
| 2               | 11.91    | 252                     | 502                     | 28.21    |  |
| 3               | 32.86    | 541                     | 1063                    | 99.39    |  |
| 4               | 12.22    | 256                     | 510                     | 36.75    |  |
| 5               | 19.29    | 385                     | 764                     | 58.63    |  |
| 6               | 10.45    | 222                     | 443                     | 30.44    |  |
| 7               | 11.53    | 238                     | 472                     | 35.34    |  |
| 8               | 5.92     | 136                     | 272                     | 13.33    |  |
| 9               | 17.59    | 339                     | 672                     | 52.83    |  |
| 10              | 11.39    | 259                     | 516                     | 32.85    |  |

**Table 7** Results for MOKP instances with  $|K| = 3$  and  $n = 50$

|                 |          | Kirlik and Sayin (2014) | Disjunctive Programming |          |  |
|-----------------|----------|-------------------------|-------------------------|----------|--|
| Instance number | Time (s) | No. Sol.                | No. Disj.               | Time (s) |  |
| 1               | 34.65    | 507                     | 995                     | 101.01   |  |
| 2               | 9.31     | 202                     | 395                     | 20.13    |  |
| 3               | 32.08    | 530                     | 1052                    | 89.26    |  |
| 4               | 20.4     | 402                     | 791                     | 66.59    |  |
| 5               | 35.09    | 557                     | 1103                    | 110.9    |  |
| 6               | 61.01    | 803                     | 1567                    | 193.63   |  |
| 7               | 35.7     | 519                     | 1026                    | 107.48   |  |
| 8               | 7.52     | 178                     | 357                     | 21.01    |  |
| 9               | 21.37    | 361                     | 713                     | 62.72    |  |
| 10              | 22.15    | 383                     | 761                     | 68.76    |  |

**Table 8** Results for MOKP instances with  $|K| = 4$  and  $n = 20$ 

|                 |          | Kirlik and Sayin (2014) | Disjunctive Programming |          |  |
|-----------------|----------|-------------------------|-------------------------|----------|--|
| Instance number | Time (s) | No. Sol.                | No. Disj.               | Time (s) |  |
| 1               | 3.03     | 60                      | 241                     | 3.93     |  |
| 2               | 14.1     | 143                     | 632                     | 12.15    |  |
| 3               | 117.63   | 325                     | 1745                    | 67.78    |  |
| 4               | 0.39     | 17                      | 59                      | 0.92     |  |
| 5               | 4.55     | 74                      | 333                     | 5.74     |  |
| 6               | 15.93    | 152                     | 685                     | 14.83    |  |
| 7               | 22.37    | 175                     | 869                     | 25.16    |  |
| 8               | 9.25     | 116                     | 567                     | 9.63     |  |
| 9               | 4.56     | 77                      | 338                     | 6.22     |  |
| 10              | 44.14    | 229                     | 1124                    | 32.49    |  |

**Table 9** Results for MOKP instances with  $|K| = 4$  and  $n = 30$ 

|                 |          | Kirlik and Sayin (2014) | Disjunctive Programming |          |  |
|-----------------|----------|-------------------------|-------------------------|----------|--|
| Instance number | Time (s) | No. Sol.                | No. Disj.               | Time (s) |  |
| 1               | 864.75   | 563                     | 2861                    | 290.12   |  |
| 2               | 603.42   | 535                     | 2805                    | 245.04   |  |
| 3               | 45.12    | 226                     | 1108                    | 40.54    |  |
| 4               | 536.59   | 517                     | 2781                    | 255.61   |  |
| 5               | 75.91    | 281                     | 1377                    | 47.45    |  |
| 6               | 22.07    | 191                     | 833                     | 26.85    |  |
| 7               | 311.62   | 480                     | 2362                    | 204.78   |  |
| 8               | 62       | 262                     | 1263                    | 58.47    |  |
| 9               | 25.7     | 186                     | 820                     | 25.46    |  |
| 10              | 1868.06  | 735                     | 3678                    | 488.73   |  |

**Table 10** Results for MOKP instances with  $|K| = 4$  and  $n = 40$ 

|                 |          | Kirlik and Sayin (2014) | Disjunctive Programming |          |  |
|-----------------|----------|-------------------------|-------------------------|----------|--|
| Instance number | Time (s) | No. Sol.                | No. Disj.               | Time (s) |  |
| 1               | 1766.00  | 901                     | 4516                    | 906.28   |  |
| 2               | 3600     | 1427                    | 7949                    | 3600     |  |
| 3               | 352.52   | 508                     | 2349                    | 213.3    |  |
| 4               | 3600     | 1248                    | 6139                    | 2139.9   |  |
| 5               | 3600     | 1391                    | 7945                    | 3600     |  |
| 6               | 3600     | 1357                    | 7944                    | 3600     |  |
| 7               | 3600     | 1390                    | 7769                    | 3600     |  |
| 8               | 1671.44  | 741                     | 3981                    | 640.96   |  |
| 9               | 3600     | 1486                    | 7683                    | 3600     |  |
| 10              | 552.02   | 555                     | 2785                    | 293.96   |  |

**Table 11** Results for MOKP instances with  $|K| = 5$  and  $n = 15$

|                 |          | Kirlik and Sayin (2014)   Disjunctive Programming |           |          |
|-----------------|----------|---------------------------------------------------|-----------|----------|
| Instance number | Time (s) | No. Sol.                                          | No. Disj. | Time (s) |
| 1               | 63.11    | 72                                                | 766       | 11.83    |
| 2               | 40.71    | 59                                                | 759       | 11.69    |
| 3               | 328.07   | 125                                               | 1226      | 27.53    |
| 4               | 29.83    | 65                                                | 551       | 8.48     |
| 5               | 6.91     | 47                                                | 341       | 4.44     |
| 6               | 1.36     | 20                                                | 171       | 1.93     |
| 7               | 7.13     | 47                                                | 431       | 5.37     |
| 8               | 2.95     | 30                                                | 249       | 3.24     |
| 9               | 0.75     | 16                                                | 97        | 1.13     |
| 10              | 107.65   | 96                                                | 920       | 15.53    |

**Table 12** Results for MOKP instances with  $|K| = 5$  and  $n = 20$

|                 |          | Kirlik and Sayin (2014)   Disjunctive Programming |           |          |
|-----------------|----------|---------------------------------------------------|-----------|----------|
| Instance number | Time (s) | No. Sol.                                          | No. Disj. | Time (s) |
| 1               | 3600     | 220                                               | 2277      | 98.68    |
| 2               | 134.59   | 95                                                | 801       | 15.12    |
| 3               | 47.26    | 76                                                | 603       | 9.62     |
| 4               | 127.41   | 89                                                | 1007      | 18.04    |
| 5               | 456.34   | 110                                               | 1018      | 19.06    |
| 6               | 71.15    | 87                                                | 706       | 11.72    |
| 7               | 23.61    | 61                                                | 531       | 8.1      |
| 8               | 2796.22  | 211                                               | 2217      | 86.16    |
| 9               | 3600     | 237                                               | 3504      | 177.59   |
| 10              | 3600     | 426                                               | 5993      | 889.9    |

**Table 13** Results for MOKP instances with  $|K| = 5$  and  $n = 25$

|                 |          | Kirlik and Sayin (2014)   Disjunctive Programming |           |          |
|-----------------|----------|---------------------------------------------------|-----------|----------|
| Instance number | Time (s) | No. Sol.                                          | No. Disj. | Time (s) |
| 1               | 3600     | 679                                               | 9958      | 3600     |
| 2               | 3600     | 687                                               | 5482      | 3600     |
| 3               | 3600     | 540                                               | 10690     | 3600     |
| 4               | 1624.33  | 172                                               | 1814      | 55.03    |
| 5               | 3600     | 309                                               | 3469      | 262.01   |
| 6               | 3600     | 612                                               | 8711      | 3600     |
| 7               | 3600     | 448                                               | 5568      | 920.71   |
| 8               | 272.78   | 103                                               | 933       | 17.78    |
| 9               | 3600     | 689                                               | 9607      | 3600     |
| 10              | 3600     | 452                                               | 5881      | 985.93   |

**Table 14** Results for MOTSP instances with  $|K| = 3$  and  $n = 10$ 

|                 |          | Kirlik and Sayin (2014)   Disjunctive Programming |           |          |
|-----------------|----------|---------------------------------------------------|-----------|----------|
| Instance number | Time (s) | No. Sol.                                          | No. Disj. | Time (s) |
| 1               | 47.83    | 117                                               | 192       | 11.93    |
| 2               | 105.95   | 207                                               | 322       | 33.03    |
| 3               | 72.99    | 157                                               | 251       | 18.79    |
| 4               | 49.99    | 87                                                | 150       | 10.19    |
| 5               | 58.52    | 139                                               | 225       | 15.1     |
| 6               | 20.41    | 51                                                | 91        | 4.7      |
| 7               | 60.29    | 112                                               | 186       | 13.66    |
| 8               | 67.19    | 152                                               | 240       | 15.43    |
| 9               | 63.14    | 188                                               | 303       | 17.41    |
| 10              | 14.44    | 50                                                | 90        | 4.38     |

**Table 15** Results for MOTSP instances with  $|K| = 3$  and  $n = 15$ 

|                 |          | Kirlik and Sayin (2014)   Disjunctive Programming |           |          |
|-----------------|----------|---------------------------------------------------|-----------|----------|
| Instance number | Time (s) | No. Sol.                                          | No. Disj. | Time (s) |
| 1               | 572.65   | 335                                               | 516       | 75.02    |
| 2               | 1123.4   | 584                                               | 880       | 178.87   |
| 3               | 1632.82  | 724                                               | 1044      | 203.02   |
| 4               | 1039.16  | 462                                               | 701       | 118.74   |
| 5               | 993.63   | 487                                               | 727       | 144.77   |
| 6               | 967.13   | 453                                               | 687       | 121.32   |
| 7               | 1079.35  | 675                                               | 968       | 193.53   |
| 8               | 1596.23  | 811                                               | 1120      | 237.44   |
| 9               | 1182.46  | 433                                               | 671       | 113.01   |
| 10              | 1438.11  | 708                                               | 1048      | 228.05   |

**Table 16** Results for MOTSP instances with  $|K| = 3$  and  $n = 20$ 

|                 |          | Kirlik and Sayin (2014)   Disjunctive Programming |           |          |
|-----------------|----------|---------------------------------------------------|-----------|----------|
| Instance number | Time (s) | No. Sol.                                          | No. Disj. | Time (s) |
| 1               | 4964.52  | 1364                                              | 1936      | 902.33   |
| 2               | 4737.66  | 1487                                              | 2078      | 1186.88  |
| 3               | 3110.1   | 798                                               | 1123      | 520.34   |
| 4               | 4502.96  | 1656                                              | 2237      | 1381.76  |
| 5               | 5960.21  | 1811                                              | 2517      | 1330.76  |
| 6               | 3688.11  | 909                                               | 1305      | 592.17   |
| 7               | 3641.5   | 1250                                              | 1736      | 821.93   |
| 8               | 3158.06  | 1121                                              | 1595      | 680.27   |
| 9               | 3777.01  | 1517                                              | 2070      | 924.59   |
| 10              | 3718.82  | 1013                                              | 1454      | 660.93   |
